# Supplementary material
Source: PubMed Central journal article supplement (PMC6060687)
Supplement: TX-007-C7TX00304H-s001.pdf [file TX-007-C7TX00304H-s001.pdf]

**S 1. None of the treatments could affect the body weight and lung weight of the mice.** There is no difference in body weight and lung weight of the mice among Control, SiO<sub>2</sub>, Bixin and Bixin+SiO<sub>2</sub> groups in 56 days. (A) The mice body weight of the indicated groups were measured weekly. (B) The lung weight with each treatment in the different times were measured and the relative lung weight (the ratio of lung weight to body weight) were calculated ( $n=8$ ) ( $*p < 0.05$  indicated doses of NP treated groups vs. control group).
